# Supplementary material for: Effects of Flavanols on Enteroendocrine Secretion
Source: PubMed Central journal article supplement (PMC7355421; doi:10.3390/biom10060844), 2020-06-01
Supplement: biomolecules-10-00844-s001.pdf [file biomolecules-10-00844-s001.pdf]

## Effects of flavanols on enteroendocrine secretion

Carme Grau; Carlos González-Quilen; Ximena Terra; MTeresa Blay; Raul Beltrán-Debón; Rosa Jorba-Martín; Beatriz Espina; Montserrat Pinent and Anna Ardévol

### Supplementary materials

**Table S1.** Basal enterohormone levels in the basolateral side of the controls in the different intestinal segments of pig samples. Values represent mean  $\pm$  SEM. \*  $p < 0.05$ , T-test. n=7-14.

| PYY (pM)         |                    | GLP-1 (pM)       |                    |
|------------------|--------------------|------------------|--------------------|
| pig              |                    | pig              |                    |
| duodenum         | descendant colon   | ascendant colon  | descendant colon   |
| 0.92 $\pm$ 0.23  | 0.08 $\pm$ 0.16 *  | 10.73 $\pm$ 2.40 | 32.53 $\pm$ 9.80 * |
| PYY (pM)         |                    | GLP-1 (pM)       |                    |
| human            |                    | human            |                    |
| ascendant colon  | descendant colon   | ascendant colon  | descendant colon   |
| 13.72 $\pm$ 4.09 | 35.85 $\pm$ 3.40 * | 14.75 $\pm$ 4.27 | 10.73 $\pm$ 4.00   |
